# Supplementary material for: Alcohol Consumption during Adolescence and Risk of Diabetes in Young Adulthood
Source: Hindawi journal article supplement (doi:10.1155/2014/795741), 2014-01-01
Supplement: f1 [file 795741.f1.pdf]

## Supplementary table (online material)

Table A1: Alcohol consumption during adolescence and risk of diabetes, controlling for multiple confounders and using lifetime abstainers as reference group

|                                                              | Odds Ratio | 95%  | CI    |
|--------------------------------------------------------------|------------|------|-------|
| <b>Wave I alcohol consumption</b>                            |            |      |       |
| lifetime abstainer                                           | reference  |      |       |
| current abstainer^                                           | 0.34       | 0.15 | 0.77  |
| 3-7days/week, < 5drinks/occasion                             | 0.33       | 0.05 | 2.12  |
| 3-7days/week, 5+ drinks/ occasion^                           | 4.24       | 1.66 | 10.83 |
| 2-8 days/month, < 5drinks/occasion                           | 0.47       | 0.18 | 1.24  |
| 2-8 days/month, 5+ drinks/ occasion^                         | 0.20       | 0.06 | 0.61  |
| 1-12 days/year, < 5drinks/occasion                           | 0.83       | 0.49 | 1.40  |
| 1-12 days/year, 5+ drinks/ occasion                          | 0.39       | 0.14 | 1.05  |
| <b>Wave III alcohol consumption</b>                          |            |      |       |
| lifetime abstainer                                           | reference  |      |       |
| current abstainer                                            | 0.64       | 0.24 | 1.70  |
| 3-7days/week, < 5drinks/occasion                             | 0.66       | 0.20 | 2.21  |
| 3-7days/week, 5+ drinks/ occasion                            | 0.75       | 0.31 | 1.80  |
| 2-8 days/month, < 5drinks/occasion                           | 0.56       | 0.28 | 1.13  |
| 2-8 days/month, 5+ drinks/ occasion                          | 0.51       | 0.25 | 1.07  |
| 1-12 days/year, < 5drinks/occasion                           | 0.67       | 0.38 | 1.18  |
| 1-12 days/year, 5+ drinks/ occasion                          | 0.56       | 0.21 | 1.47  |
| <b>Gender</b>                                                |            |      |       |
| male                                                         | reference  |      |       |
| female                                                       | 1.02       | 0.67 | 1.56  |
| <b>Age strata at wave IV separated by quartiles</b>          |            |      |       |
| 1st strata (youngest)                                        | reference  |      |       |
| 2nd strata                                                   | 1.21       | 0.68 | 2.16  |
| 3rd strata                                                   | 1.41       | 0.79 | 2.53  |
| 4th strata                                                   | 1.75       | 0.96 | 3.17  |
| <b>Race</b>                                                  |            |      |       |
| white                                                        | reference  |      |       |
| Black^                                                       | 3.29       | 1.98 | 5.48  |
| Other                                                        | 1.42       | 0.67 | 3.04  |
| <b>Ever smoke regularly: 1+ cigarettes /day (Wave I)</b>     |            |      |       |
| no                                                           | 1.40       | 0.85 | 2.29  |
| yes                                                          | 1.61       | 0.83 | 3.10  |
| never smoked a whole cigarette                               | reference  |      |       |
| <b>Ever smoke 1+ cigarettes /day for 30+ days (Wave III)</b> |            |      |       |
| no                                                           | 1.04       | 0.58 | 1.89  |
| yes                                                          | 1.11       | 0.65 | 1.90  |
| never smoked a whole cigarette                               | reference  |      |       |

|                                                                   |           |      |      |
|-------------------------------------------------------------------|-----------|------|------|
| BMI (Wave III)                                                    |           |      |      |
| < 25                                                              | reference |      |      |
| 25-29 <sup>^</sup>                                                | 1.88      | 1.12 | 3.16 |
| 30-34 <sup>^</sup>                                                | 3.12      | 1.82 | 5.33 |
| 35+ <sup>^</sup>                                                  | 3.78      | 2.19 | 6.52 |
| Biological mother had diabetes                                    |           |      |      |
| No                                                                | reference |      |      |
| Yes                                                               | 1.27      | 0.52 | 3.10 |
| Don't know                                                        | 1.45      | 0.52 | 4.03 |
| Biological father had diabetes                                    |           |      |      |
| No                                                                | reference |      |      |
| Yes                                                               | 1.88      | 0.96 | 3.68 |
| Don't know                                                        | 1.39      | 0.73 | 2.66 |
| Father's alcohol consumption in the past 12 months (Wave I)       |           |      |      |
| Never <sup>^</sup>                                                | 2.29      | 1.18 | 4.45 |
| <= 1/month                                                        | reference |      |      |
| 2-3 days/month                                                    | 1.51      | 0.62 | 3.68 |
| 1-2 days/week                                                     | 1.70      | 0.81 | 3.57 |
| 3-7 days/week                                                     | 2.10      | 0.91 | 4.88 |
| not living with father                                            | 1.77      | 0.91 | 3.44 |
| Mother's alcohol consumption in the past 12 months (Wave I)       |           |      |      |
| never                                                             | 0.86      | 0.54 | 1.38 |
| <= 1/month                                                        | reference |      |      |
| 2-3 days/month                                                    | 0.34      | 0.14 | 0.85 |
| 1-2 days/week                                                     | 0.69      | 0.30 | 1.60 |
| 3-7 days/week                                                     | 1.15      | 0.34 | 3.88 |
| Not living with mother                                            | 0.79      | 0.23 | 2.77 |
| Urbanity of residential area (Wave I)                             |           |      |      |
| Urban                                                             | reference |      |      |
| not urban                                                         | 1.39      | 0.90 | 2.13 |
| Median household income of residential area by quartiles (Wave I) |           |      |      |
| 1st strata (lowest)                                               | reference |      |      |
| 2nd strata                                                        | 1.28      | 0.77 | 2.14 |
| 3rd strata                                                        | 1.22      | 0.67 | 2.22 |
| 4th strata                                                        | 1.14      | 0.58 | 2.24 |

---

<sup>^</sup>p value < 0.05

Table A2: Alcohol consumption during adolescence and parental diabetic status, controlling for multiple confounders and using lifetime abstainers as reference group

|                                     | Odds Ratio | 95% CI    |
|-------------------------------------|------------|-----------|
| <b>Wave I alcohol consumption</b>   |            |           |
| lifetime abstainer                  | reference  |           |
| current abstainer                   | 0.84       | 0.44 1.61 |
| 3-7days/week, < 5drinks/occasion    | 1.45       | 0.31 6.73 |
| 3-7days/week, 5+ drinks/ occasion   | 0.71       | 0.18 2.89 |
| 2-8 days/month, < 5drinks/occasion  | 1.56       | 0.82 2.95 |
| 2-8 days/month, 5+ drinks/ occasion | 1.11       | 0.55 2.24 |
| 1-12 days/year, < 5drinks/occasion  | 1.11       | 0.68 1.81 |
| 1-12 days/year, 5+ drinks/ occasion | 0.79       | 0.39 1.62 |
| <b>Wave III alcohol consumption</b> |            |           |
| lifetime abstainer                  | reference  |           |
| current abstainer <sup>^</sup>      | 2.56       | 1.28 5.09 |
| 3-7days/week, < 5drinks/occasion    | 1.76       | 0.67 4.62 |
| 3-7days/week, 5+ drinks/ occasion   | 0.99       | 0.43 2.29 |
| 2-8 days/month, < 5drinks/occasion  | 1.61       | 0.94 2.75 |
| 2-8 days/month, 5+ drinks/ occasion | 1.25       | 0.65 2.41 |
| 1-12 days/year, < 5drinks/occasion  | 1.38       | 0.85 2.26 |
| 1-12 days/year, 5+ drinks/ occasion | 0.92       | 0.43 1.96 |

\*Analysis controlled for the same potential confounders as those listed in Table A1, but excluding parental self-reported diabetic status from the controlled variable list.

<sup>^</sup>p value < 0.05
